# Supplementary material for: Repetitive Transcranial Magnetic Stimulation of the Intraparietal Sulcuschanges the Grip Force Modulation Exerted by Manual Action-Verbs &ndash; An Exploratory Study
Source: Preprints.org preprint supplement (doi:10.20944/preprints201901.0119.v1), 2019-01-11
Supplement: Supplementary file 2 [file supplementary]

## Sheet: IDENTIFICATION
Repetitive transcranial magnetic stimulation of the intraparietal sulcus
changes the grip force modulation exerted by manual action-verbs – an exploratory study
submitted to Experimental Brain Research
Ronaldo Luis da Silva1,2*
Johanne Higgins2,3
Victor Frak1,2
Corresponding author
Ronaldo Luis da Silva – de991157@ens.uqam.ca
1 Faculté des Sciences, Université du Québec à Montréal, Québec, Canada.
2 Centre de recherche interdisciplinaire en réadaptation (CRIR), Centre intégré universitaire de santé et de services sociaux du Centre-Sud-de-l’Île-de-Montréal (CCSMTL) – Institut universitaire sur la réadaptation en déficience physique de Montréal (IURDPM), Montréal, Québec, Canada

## Sheet: MEP
MOTOR-EVOKED POTENTIALS BY SUBJECTS
	AMPLITUDE			RIGHT HEMISPHERE - A						AMPLITUDE			RIGHT HEMISPHERE - Z
		P1	P2	P3	P4	P5	P6	P7			P1	P2	P3	P4	P5	P6	P7
	1	218.106	506.559	49.4417	15.1568	12.4501	23.583	59.9023		1	13.6091	488.528	52.231	18.2927	16.7001	102.285	21.8382
	2	526.699	519.086	56.9657	49.5851	13.1614	34.5721	77.558		2	23.7514	519.919	56.2922	18.8345	19.2442	174.158	22.5948
	3	531.371	537.905	67.2307	75.7371	13.196	51.6975	78.801		3	27.1607	527.476	60.2386	38.8778	308.932	184.453	48.1785
	4	565.792	542.712	73.4687	76.9895	14.5231	54.7043	80.08		4	124.886	562.823	103.42	67.1767	311.111	241.784	52.6508
	5	580.342	571.097	136.363	77.6794	144.527	63.1613	90.9594		5	484.905	571.405	125.815	74.8145	366.804	246.806	52.7281
	6	1177.84	584.955	177.985	86.95	262.941	101.44	94.8681		6	511.728	576.969	164.092	78.3993	401.879	305.143	61.9481
	7	1683.01	592.669	189.333	90.4489	319.705	105.662	110.483		7	646.485	606.976	200.37	84.5674	407.772	309.289	64.9711
	8	1752.13	603.963	244.237	111.487	379.966	130.384	126.56		8	667.987	624.646	241.541	88.2129	463.026	354.361	67.7429
	9	2559.46	682.972	261.456	140.877	405.948	241.356	252.302		9	718.855	714.107	586.408	93.4442	633.508	445.642	584.344
	10	3380.9	697.737	277.84	165.923	442.403	453.994	253.048		10	1192.78	829.016	612.727	93.4589	637.191	474.492	1522.39
	AMPLITUDE			LEFT HEMISPHERE - A						AMPLITUDE			LEFT HEMISPHERE - Z
		P1	P2	P3	P4	P5	P6	P7			P1	P2	P3	P4	P5	P6	P7
	1	108.786	66.0615	49.4068	27.9188	18.7615	57.6312	217.093		1	62.6739	55.2465	73.0875	84.6489	222.439	62.0055	284.055
	2	144.542	68.5511	49.9551	30.5307	82.3751	58.2346	264.329		2	74.7942	187.613	76.4017	107.93	16.3327	129.471	347.67
	3	163.992	73.924	53.1264	40.8217	136.202	79.6592	265.047		3	131.961	296.841	87.7685	108.565	16.7916	145.799	375.677
	4	167.561	79.8463	59.7415	47.1991	155.354	115.9	276.478		4	199.638	297.719	118.439	118.924	16.8666	156.549	400.449
	5	168.214	86.6703	69.3446	55.425	254.951	117.783	305.453		5	218.073	307.175	129.352	123.271	425.67	196.505	743.909
	6	188.656	111.388	73.0208	70.1195	324.933	123.586	307.861		6	329.695	319.772	132.612	131.717	457.326	199.854	818.019
	7	194.855	126.166	103.777	83.8563	329.338	140.727	369.225		7	460.689	331.705	139.287	140.595	647.734	215.614	915.591
	8	212.372	156.121	103.953	85.1295	355.476	142.131	527.186		8	481.674	360.434	139.366	168.908	651.902	217.39	1409.16
	9	222.671	201.416	125.774	85.3302	424.961	151.637	817.108		9	507.937	362.454	148.848	265.413	683.853	294.173	1503.12
	10	225.749	229.734	195.402	95.5498	425.857	279.327	1357.91		10	698.68	412.722	554.722	296.719	1004.68	403.116	2000.72
	DURATION			RIGHT HEMISPHERE - A						DURATION			RIGHT HEMISPHERE - Z
		2EP06	2EP07	2EP08	2EP09	2EP10	2EP11	2EP12			2EP06	2EP07	2EP08	2EP09	2EP10	2EP11	2EP12
	1	0.0305	0.021	0.01	0.012	0.0105	0.003	0.0075		1	0.001	0.0165	0.012	0.0075	0.01	0.0145	0.004
	2	0.0305	0.0215	0.0115	0.0125	0.012	0.0055	0.008		2	0.001	0.017	0.0135	0.008	0.01	0.015	0.005
	3	0.031	0.0215	0.012	0.0125	0.0135	0.0095	0.0085		3	0.003	0.0175	0.014	0.011	0.0115	0.0155	0.0075
	4	0.0315	0.022	0.0125	0.013	0.0145	0.01	0.0105		4	0.011	0.0195	0.014	0.0115	0.013	0.016	0.0075
	5	0.0315	0.022	0.013	0.014	0.015	0.01	0.011		5	0.015	0.02	0.016	0.0115	0.0135	0.017	0.008
	6	0.033	0.0225	0.0165	0.014	0.015	0.0115	0.0115		6	0.015	0.0205	0.0205	0.012	0.014	0.018	0.008
	7	0.0335	0.0225	0.017	0.0155	0.08	0.0145	0.0125		7	0.0155	0.0205	0.0215	0.014	0.015	0.0185	0.01
	8	0.035	0.023	0.0175	0.0165	0.08	0.017	0.019		8	0.016	0.0215	0.0215	0.015	0.0155	0.02	0.0105
	9	0.035	0.0255	0.0195	0.023	0.08	0.018	0.0245		9	0.018	0.025	0.022	0.08	0.0385	0.02	0.029
	10	0.0365	0.029	0.02	0.08	0.08	0.0185	0.025		10	0.08	0.029	0.0245	0.08	0.08	0.0205	0.034
												LHZ
	DURATION			LEFT HEMISPHERE - A						DURATION			LEFT HEMISPHERE - Z
		2EP06	2EP07	2EP08	2EP09	2EP10	2EP11	2EP12			2EP06	2EP07	2EP08	2EP09	2EP10	2EP11	2EP12
	1	0.004	0.003	0.003	0.011	0.007	0.006	0.0075		1	0.006	0.0115	0.0085	0.0145	0.0135	0.011	0.0075
	2	0.0045	0.0035	0.0045	0.0115	0.01	0.007	0.015		2	0.0105	0.016	0.0095	0.0145	0.0135	0.0115	0.014
	3	0.005	0.005	0.0055	0.013	0.0105	0.0085	0.016		3	0.011	0.016	0.011	0.0155	0.0135	0.013	0.0145
	4	0.0055	0.006	0.007	0.0135	0.011	0.0095	0.0195		4	0.0115	0.019	0.011	0.016	0.014	0.0135	0.024
	5	0.006	0.0095	0.007	0.015	0.011	0.01	0.021		5	0.012	0.0195	0.012	0.017	0.0145	0.0135	0.0245
	6	0.006	0.0125	0.008	0.016	0.011	0.0105	0.0215		6	0.012	0.02	0.0135	0.018	0.015	0.0135	0.0255
	7	0.007	0.017	0.0105	0.0165	0.012	0.011	0.022		7	0.012	0.0205	0.014	0.018	0.04	0.014	0.0255
	8	0.0085	0.018	0.0115	0.017	0.013	0.016	0.0235		8	0.015	0.0215	0.0165	0.0205	0.08	0.015	0.026
	9	0.009	0.08	0.012	0.017	0.0145	0.0175	0.024		9	0.0155	0.0225	0.017	0.0205	0.08	0.0165	0.033
	10	0.011	0.08	0.014	0.017	0.08	0.021	0.0295		10	0.0175	0.08	0.0275	0.024	0.08	0.0185	0.0335

## Sheet: GRIP FORCE
GRIP FORCE VALUES BY SUBJECTS, IN MILLINEWTONS
	UD-A-BL	UD-A-100	UD-A-200	UD-A-300	UD-A-400	UD-A-500	UD-A-600	UD-A-700	UD-A-800	UD-A-900	UD-Z-BL	UD-Z-100	UD-Z-200	UD-Z-300	UD-Z-400	UD-Z-500	UD-Z-600	UD-Z-700	UD-Z-800	UD-Z-900
P1	3.22724e-14	0.298506	2.40811	6.52627	16.8358	17.1533	19.0047	19.4613	19.8844	20.0631	-2.956e-14	-6.76176	6.30956	10.2151	19.8825	26.308	24.1025	22.4357	22.8789	22.8716
P2	-2.7452e-15	-5.20306	-0.948846	0.268371	3.07178	0.59677	7.89662	16.6123	18.0366	17.071	-1.23252e-14	-4.57355	-6.07315	-6.21443	-5.46565	-6.28999	-5.64989	-6.33156	-4.40141	-3.37458
P3	-1.94254e-14	9.82741	15.5209	26.1282	34.6427	36.2154	33.7421	42.0287	49.6243	49.3113	-3.93045e-14	2.27118	9.00073	14.9802	24.391	34.924	36.073	29.9939	35.0237	36.2789
P4	2.84495e-14	2.57357	2.0272	9.71709	10.1057	13.1371	20.8329	28.5293	35.4248	40.0012	-2.01223e-14	0.374941	2.51821	6.42378	8.64668	10.32	9.78447	10.3038	7.11298	4.68802
P5	-1.82384e-14	-2.18309	-0.115026	1.49387	1.73252	4.9721	9.42778	12.8622	15.1579	14.934	1.27676e-14	-4.32148	-2.09392	2.69486	6.25476	7.42282	13.1055	16.2742	21.3254	22.2477
P6	9.74047e-15	8.5025	13.9235	23.8952	21.0432	23.6484	25.2133	27.9344	19.9962	15.8522	1.09255e-14	4.55969	6.52877	13.4434	13.0441	13.4657	12.3345	10.8225	13.4209	13.5925
P7	1.75315e-15	-1.27392	-0.0498194	-0.716832	-0.53803	-0.483406	-0.52629	-5.65313	-1.81836	-1.93643	5.58581e-15	0.288014	0.0705728	1.34746	1.43418	2.67584	5.3427	6.0468	7.48793	8.60081
	UN-A-BL	UN-A-100	UN-A-200	UN-A-300	UN-A-400	UN-A-500	UN-A-600	UN-A-700	UN-A-800	UN-A-900	UN-Z-BL	UN-Z-100	UN-Z-200	UN-Z-300	UN-Z-400	UN-Z-500	UN-Z-600	UN-Z-700	UN-Z-800	UN-Z-900
P1	-3.30682e-15	11.3875	13.6092	21.8385	30.9897	33.8586	34.7875	34.4854	33.2931	33.2691	-1.05016e-14	5.55104	10.8894	20.0805	25.5132	26.7198	24.0224	18.2687	5.69191	2.5957
P2	-2.56739e-15	-5.08197	0.285554	1.8157	2.95793	0.203619	2.75029	3.34016	4.72711	4.98694	2.47849e-14	-3.49803	-0.024027	3.15819	1.74814	0.630697	0.87076	-1.8264	-0.954004	-2.22528
P3	-1.5761e-14	-4.00609	-3.56498	-1.90232	2.17549	4.38788	5.01154	5.78569	2.51085	0.349106	3.25911e-15	-1.15214	-6.13159	-7.53014	-8.6787	-4.03798	-0.0737215	0.267861	1.3622	2.19381
P4	1.7833e-14	-5.16225	-8.75371	-7.81777	-2.68544	-4.59996	0.326656	1.79376	4.61428	4.07532	-7.30102e-15	-5.31915	-3.96923	-3.18492	-1.63617	-4.57982	-4.62307	-7.83271	-12.5752	-14.4766
P5	-7.43654e-15	-1.13806	0.862005	4.54416	8.60999	10.5046	12.3716	12.0509	10.8091	10.1796	1.23035e-14	-2.77119	-3.79179	-3.11559	-1.82429	-0.60776	2.65678	2.4779	1.75595	1.43449
P6	-3.38271e-15	1.26775	12.023	22.8872	20.8043	15.473	20.5612	26.1596	28.027	31.5723	-7.14489e-15	8.53109	9.23873	10.4495	11.2557	14.0279	14.5229	16.7373	18.0065	16.1569
P7	-9.99634e-16	0.115351	0.453147	2.29655	5.47688	6.32583	7.01214	8.73974	11.457	12.0268	5.85469e-15	-0.350373	-1.71664	-2.52902	-2.25402	-0.88173	-1.52852	-1.79835	-0.396154	0.254772
